# Supplementary material
Source: PubMed Central journal article supplement (PMC11569693)
Supplement: sj-pdf-3-sph-10.1177_19417381241275659.pdf [file sj-pdf-3-sph-10.1177_19417381241275659.pdf]

### Appendix 3. Detailed Study Outcomes

| Anatomical Region / Tendon           | Author (Year)                                     | Study Design               | Level of evidence | Sample size (n) | Tenotomy Method      | Comparator Group                       | Outcomes for Tenotomy Group                                                                  |                                                                                        |
|--------------------------------------|---------------------------------------------------|----------------------------|-------------------|-----------------|----------------------|----------------------------------------|----------------------------------------------------------------------------------------------|----------------------------------------------------------------------------------------|
|                                      |                                                   |                            |                   |                 |                      |                                        | Pain                                                                                         | Patient Reported Outcome                                                               |
| Lateral Elbow                        | Altahawi, et al (2020) <sup>1</sup>               | Retrospective Cohort Study | 3                 | 23              | TENEX                | Surgical tenotomy                      | Oxford Elbow Score pain improved from 60 to 12 at 12 mos                                     | QDASH improved from 56 to 12 at 12 mos                                                 |
|                                      | Koh, et al* (2013) <sup>28</sup> (original study) | Case Series                | 4                 | 20              | TENEX                |                                        | VAS improved from 5.5 to 3.3, 3.0, 2.0, 1.0, and 0.5 at 1 week, 1 mo, 3 mos, 6 mos, & 1 year | DASH-C improved from 24.2 to 12.5, 8.9, 5.8, and 3.3 at 1 mo, 3 mos, 6 mos, and 1 year |
|                                      | Seng, et al (2016) <sup>37</sup> (3-year f/u)     |                            |                   | 20              |                      |                                        | VAS improved from 5.5 to 0.0 at 36 mos                                                       | DASH-C improved from 24.2 to 6.3 at 1 mo, and 0 at 3-, 6-, and 12-mos                  |
|                                      | Ang, et al (2021) <sup>4</sup> (90 mo f/u)        |                            |                   | 19              |                      |                                        | VAS improved from 5.5 to 0 at 90 months                                                      | DASH-C improved from 24.2 at baseline to 0 at 36 months.                               |
|                                      |                                                   |                            |                   |                 |                      |                                        |                                                                                              | DASH-work improved from 25.0 to 0 36 mos                                               |
|                                      |                                                   |                            |                   |                 |                      |                                        |                                                                                              | DASH-C improved from 24.2 to 0.8 at 90 months                                          |
|                                      | Barnes, et al (2015) <sup>6</sup>                 | Prospective Cohort Study   | 4                 | 12              | TENEX                |                                        | VAS improved from 6.4 to 0.7 at 12 mos                                                       | QDASH improved from 44.1 to 8.6 at 12 mos                                              |
|                                      |                                                   |                            |                   |                 |                      |                                        | Mayo Elbow Performance Score improved from 59.1 to 83.4 at 12 mos                            |                                                                                        |
| Battista et al (2018) <sup>7</sup>   | Case Series                                       | 4                          | 7                 | TENEX           |                      | VAS improved from 7.9 to 1.1 at 24 mos | ASES improved from 55.6 to 94.1 at 24 months                                                 |                                                                                        |
| Boden, et al (2019) <sup>8</sup> †   | Retrospective Cohort Study                        | 2                          | 25                | TENEX           | TENEX + PRP          | VAS improved from 5.5 to 2.2 at 10 mos | QDASH improved from 35.9 to 12.5 at 10 mos                                                   |                                                                                        |
| Bureau, et al (2022) <sup>11</sup> † | Randomized Clinical Trial                         | 1                          | 31                | PNT             | Surgical debridement | PRTEE improved by 33.8 at 12 mos       | QDASH improved by 29.4 at 12 mos                                                             |                                                                                        |

|              |                                         |                            |   |     |       |                                               |                                                                                                                                                                             |                                                                              |
|--------------|-----------------------------------------|----------------------------|---|-----|-------|-----------------------------------------------|-----------------------------------------------------------------------------------------------------------------------------------------------------------------------------|------------------------------------------------------------------------------|
|              | Chalian, et al (2021) <sup>12</sup>     | Retrospective Cohort Study | 4 | 37  | TENEX |                                               | PRTEE improved from 28.7 to 9.9 at 531 days                                                                                                                                 | DASH score improved from 56.2 to 14.5 at 531 days                            |
|              | Fick, et al (2021) <sup>20</sup>        | Retrospective Cohort Study | 4 | 87  | TENEX |                                               | Improved from “moderate/daily” to “no pain” at long-term follow up via Mayo Performance Scale                                                                               | SF-12 PCS function and QOL improved from 36.7 to 48.0 at long term follow up |
|              | Kirschner, et al (2021) <sup>27</sup> † | Randomized Clinical Trial  | 1 | 6   | PNT   | PNT + PRP                                     | **VAS improved from 6.9 to 1.9 at 2 years                                                                                                                                   |                                                                              |
|              | Lavallee and Bush (2021) <sup>30</sup>  | Prospective Cohort Study   | 3 | 22  | TENEX |                                               | VAS improved from 7.2 to 1.4 at 1 year                                                                                                                                      | DASH score improved from 41.5 to 10.4 at 1 year                              |
|              | Martin, et al (2019) <sup>32</sup> ‡    | Randomized Clinical Trial  | 3 | 51  | PNT   | PNT + PRP                                     | **VAS improved from 5.87 to 1.73 at 20 mos                                                                                                                                  | DASH-E improved from 42.76 to 14.47 at 20 mos                                |
|              | Nakagawa, et al (2023) <sup>35</sup> †  | Retrospective Cohort Study | 3 | 15  | TENEX | TENEX + amniotic membrane allograft injection | VAS improved from 7.2 to 2.2 at 12 mos                                                                                                                                      |                                                                              |
|              | Rupe, et al (2023) <sup>36</sup>        | Retrospective Cohort Study | 4 | 52  | PNT   | PRP Injection                                 | Ortho Pain 4 improved from 5.94 to 3.32 at 12 wks; 21.9% reported complete resolution of pain, and 40.6% reported at least 90% improvement in pain.                         |                                                                              |
|              | Stover, et al (2019) <sup>39</sup>      | Retrospective Cohort Study | 4 | 104 | TENEX |                                               | 87% of patients had “moderate/daily” or “severe/constant” pain improved to 11% at 2.7-year f/u. 88% of patients had either “none” or “mild/occasional” pain at 2.7-year f/u |                                                                              |
| Medial Elbow | Barnes, et al (2015) <sup>6</sup>       | Prospective Cohort Study   | 4 | 7   | TENEX |                                               | VAS improved from 6.4 to 0.7 at 12 mos                                                                                                                                      | Quick DASH improved from 44.1 to 8.6 at 12 mos                               |

|          |                                         |                                   |   |    |       |             |                                                                                                                                                                      |                                                                                                 |
|----------|-----------------------------------------|-----------------------------------|---|----|-------|-------------|----------------------------------------------------------------------------------------------------------------------------------------------------------------------|-------------------------------------------------------------------------------------------------|
|          | Boden, et al (2019) <sup>8</sup> †      | Retrospective Cohort Study        | 2 | 5  | TENEX | TENEX + PRP | VAS improved from 5.5 to 2.2 at 10 mos                                                                                                                               | QDASH improved from 35.9 to 12.5 at 10 mos                                                      |
|          | Fick, et al (2021) <sup>20</sup>        | Retrospective Cohort Study        | 4 | 87 | TENEX |             | Improved from “moderate/daily” to “no pain” at long-term follow up via Mayo Performance Scale                                                                        | SF-12 PCS function and QOL improved from 36.7 to 48.0 at long term follow up                    |
|          | Kirschner, et al (2021) <sup>27</sup> † | Randomized Clinical Trial         | 1 | 6  | PNT   | PNT + PRP   | **VAS improved from 6.9 to 1.9 at 2 years                                                                                                                            |                                                                                                 |
|          | Lavallee and Bush (2021) <sup>30</sup>  | Prospective Cohort Study          | 3 | 3  | TENEX |             | VAS improved from 7.2 to 1.4 at 1 year                                                                                                                               | DASH improved from 41.5 to 10.4 at 1 year.                                                      |
|          | Martin, et al (2019) <sup>32</sup> †    | Randomized Clinical Trial         | 3 | 51 | PNT   | PNT + PRP   | **VAS improved from 5.87 to 1.73 at 20 mos                                                                                                                           | DASH improved from 42.76 to 14.47 at 20 mos                                                     |
|          | Stover, et al (2019) <sup>39</sup>      | Retrospective Cohort Study        | 4 | 19 | TENEX |             | 93% of patients had “moderate/daily” or “severe/constant” pain at baseline, improving to 100% of patients reporting “none” or “mild/occasional” pain at 2.7 year f/u |                                                                                                 |
| Achilles | Fick, et al (2021) <sup>20</sup>        | Retrospective Cohort Study        | 4 | 57 | TENEX |             | Mean scores improved from “moderate/daily” to “mild/occasional” via AOFAS.                                                                                           | SF-12 PCS function and QOL improved from 36.8 to 49.2 at long term f/u for midportion Achilles. |
|          | Lavallee and Bush (2021) <sup>30</sup>  | Prospective Cohort Study          | 3 | 27 | TENEX |             | VAS improved from 7.2 to 1.4 at 1 year                                                                                                                               | Lower Extremity Functional Score improved from 42.5 to 65.8 at 1 yr                             |
| Gluteal  | Baker and Mahoney (2020) <sup>5</sup>   | Case Series                       | 4 | 29 | TENEX |             | VAS improved from 5.86 to 2.82 at 18 mos                                                                                                                             | Harris Hip Score improved from 60.63 to 77.47 at 18 mos                                         |
|          | Jacobson, et al (2016) <sup>25</sup> †  | Prospective Study with Comparator | 2 | 15 | PNT   | PRP         | Pain scores improved from 32.4 to 15.2 at 17.6 days; Follow-up of 14/15 of PNT group showed                                                                          |                                                                                                 |

|                    |                                         | Group, not randomized      |   |    |       |           | 10/14 (71%) had sustained improvement at 128 days                                                                                                                              |                                                                               |
|--------------------|-----------------------------------------|----------------------------|---|----|-------|-----------|--------------------------------------------------------------------------------------------------------------------------------------------------------------------------------|-------------------------------------------------------------------------------|
|                    | Kirschner, et al (2021) <sup>27</sup> † | Randomized Clinical Trial  | 1 | 6  | PNT   | PNT + PRP | **VAS improved from 6.9 to 1.9 at 2 years                                                                                                                                      |                                                                               |
| Patellar           | Fick, et al (2021) <sup>20</sup>        | Retrospective Cohort Study | 4 | 38 | TENEX |           | Pain scores improved from “moderate/daily” to “mild/occasional” via Kujala Pain Scale.                                                                                         | SF-12 PCS function and QOL improved from 41.7 to 49.2 at long term follow up. |
|                    | Kirschner, et al (2021) <sup>27</sup> † | Randomized Clinical Trial  | 1 | 2  | PNT   | PNT + PRP | **VAS improved from 6.9 to 1.9 at 2 years                                                                                                                                      |                                                                               |
|                    | Lavallee and Bush (2021) <sup>30</sup>  | Prospective Cohort Study   | 3 | 9  | TENEX |           | VAS improved from 7.2 to 1.4 at 1 year                                                                                                                                         | Lower Extremity Functional Score improved from 42.5 to 65.8 at 1 yr           |
| Triceps            | Stover, et al (2019) <sup>39</sup>      | Retrospective Cohort Study | 4 | 8  | TENEX |           | 100% of patients had “moderate/daily” or “severe/constant” pain at baseline, improving to 100% of patients reporting “none” or “mild/occasional” pain at short-term follow up. |                                                                               |
| Plantar Fascia     | Fick, et al (2021) <sup>20</sup>        | Retrospective Cohort Study | 4 | 80 | TENEX |           | Pain scores improved from “moderate/daily” to “mild/occasional” via AOFAS.                                                                                                     | SF-12 PCS function and QOL improved from 36.0 to 48.0 at long term follow up. |
|                    | Lavallee and Bush (2021) <sup>30</sup>  | Prospective Cohort Study   | 3 | 41 | TENEX |           | VAS improved from 7.2 to 1.4 at 1 year                                                                                                                                         | Lower Extremity Functional Score improved from 42.5 to 65.8 at 1 yr.          |
| Hamstring          | Kirschner, et al (2021) <sup>27</sup> † | Randomized Clinical Trial  | 1 | 2  | PNT   | PNT + PRP | **VAS improved from 6.9 to 1.9 at 2 years                                                                                                                                      |                                                                               |
| Tensor Fascia Lata | Bradberry, et al (2018) <sup>9</sup>    | Case Series                | 4 | 2  | PNT   |           | Case 1: Minimal improvement at 6 weeks; second procedure at 6 weeks with complete                                                                                              |                                                                               |

|                 |                                         |                            |   |    |       |           |                                                                                                                                                                                      |
|-----------------|-----------------------------------------|----------------------------|---|----|-------|-----------|--------------------------------------------------------------------------------------------------------------------------------------------------------------------------------------|
|                 |                                         |                            |   |    |       |           | resolution of pain at 2 wks.<br>Case 2: Complete resolution of pain at 8-week f/u                                                                                                    |
| Iliotibial Band | Wahezi, et al (2023) <sup>43</sup>      | Retrospective Cohort Study | 2 | 48 | TENEX |           | Median NRS-11 improved from 9 to 5 at 1-yr with 70% endorsing pain relief, 57% improvement in side-lying, 78% improvement in sit-to-stand, and 66% improvement in walking tolerance. |
| Supraspinatus   | Kirschner, et al (2021) <sup>27</sup> † | Randomized Clinical Trial  | 1 | 3  | PNT   | PNT + PRP | **VAS improved from 6.9 to 1.9 at 2 years                                                                                                                                            |

\* Articles by Seng, et al., and Ang, et al. were longitudinal follow up studies of the original research article by Koh, et al.

\*\* Authors reported results for all body regions in aggregate.

† No statistically significant difference between groups.

Abbreviations: DASH, Disabilities of the Arm, Shoulder and Hand; QDASH, Quick DASH; DASH-C, DASH Compulsory score; VAS, visual analog scale; ASES, American Shoulder Elbow Surgeons Shoulder Score; PNT, percutaneous needle tenotomy; PRTEE, Patient-rated tennis elbow evaluation; PRP, platelet-rich plasma; PCS, Physical Component Score; SF-12, Short-Form 12; QOL, quality of life; AOFAS, American Orthopedic Foot and Ankle Score; NRS, numeric rating scale
